# Supplementary material for: Progression of pediatric celiac disease from potential celiac disease to celiac disease: a retrospective cohort study
Source: Springer Nature journal article supplement (doi:10.1186/s12887-021-02625-z), 2021-03-29
Supplement: MOESM1 [file 19016562]

| Supplementary Table 1. Demographic Data and Lab Results of Potential Celiac Patients |        |           |                  |                    |                                  |                                  |                                  |                                  |                                         |                                         |                              |                              |                     |                                                                                   |                                                                                                                                             |                               |
|--------------------------------------------------------------------------------------|--------|-----------|------------------|--------------------|----------------------------------|----------------------------------|----------------------------------|----------------------------------|-----------------------------------------|-----------------------------------------|------------------------------|------------------------------|---------------------|-----------------------------------------------------------------------------------|---------------------------------------------------------------------------------------------------------------------------------------------|-------------------------------|
| SDR ID                                                                               | Gender | Race      | Age at Encounter | Age at Encounter 2 | Weight percentile at Encounter 1 | Weight percentile at Encounter 2 | Weight percentile at Encounter 3 | Height percentile at Encounter 1 | BMi (kg/m <sup>2</sup> ) at Encounter 1 | BMi (kg/m <sup>2</sup> ) at Encounter 2 | TTS IgA t-UAs at Encounter 1 | TTS IgA t-UAs at Encounter 2 | Endomysial antibody | Biopsy #1 Result                                                                  | Biopsy #2 Result                                                                                                                            | Enter-Neopy Intestinal Incent |
| 755.79                                                                               | F      | Caucasian | 8                | 9                  | 80%                              | 80%                              | 99%                              | 99%                              | 16                                      | 16                                      | 2.85                         | 3.45                         | positive            | mild lymphocytic in duodenum without villous blunting                             | duodenitis with lymphocytosis and partial villous blunting                                                                                  | 14                            |
| 579.00                                                                               | F      | Caucasian | 12               | 15                 | 80%                              | 80%                              | 54%                              | 62%                              | 17.5                                    | unknown                                 | 1.2                          | 3.50                         | not obtained        | focal mild lymphocytosis in duodenum                                              | duodenitis with focal mild lymphocytosis and partial villous blunting                                                                       | 30                            |
| 544.00                                                                               | F      | Caucasian | 8                | 10                 | 15%                              | 35%                              | 8%                               | 6%                               | unknown                                 | 14.5                                    | 1.66                         | 0.2                          | not obtained        | mild, non-specific findings in duodenum                                           | villous blunting with marked intraepithelial lymphocytosis in duodenum, plasmacytic, prominent lymphoid follicles                           | 31                            |
| 811.0                                                                                | F      | Caucasian | 13               | 14                 | 85%                              | 85%                              | 60%                              | 62%                              | unknown                                 | 20.78                                   | 3.49                         | 3.68                         | positive            | no histopathologic abnormality in duodenum                                        | subtotal villous atrophy with intraepithelial lymphocytes and plasmacytic lamina propria with plasma cells                                  | 9                             |
| 876.8                                                                                | F      | Caucasian | 7                | 9                  | 75%                              | 80%                              | 47%                              | 47%                              | 17                                      | 19.1                                    | 1.68                         | 14.55                        | positive            | increased intraepithelial lymphocytes in duodenum                                 | focal villous blunting with increased lymphocytes in superficial epithelium                                                                 | 26                            |
| 810.84                                                                               | F      | Caucasian | 7                | 7                  | 28%                              | 35%                              | 54%                              | 61%                              | 15                                      | 14                                      | 5                            | 3.16                         | not obtained        | focal active duodenitis with preserved villous architecture                       | villous blunting with intraepithelial lymphocytosis, increased lymphoplasmic component in lamina propria, focal intraepithelial neutrophils | 6                             |
| 558.00                                                                               | F      | Caucasian | 16               | 17                 | 30%                              | 38%                              | 37%                              | 52%                              | 20                                      | 21                                      | 2.39                         | 0.33                         | not obtained        | mild increase in acute and chronic inflammation                                   | villous blunting with intraepithelial lymphocytosis, focal perigastric acute inflammation                                                   | 10                            |
|                                                                                      | F      | Caucasian | 9                | 10                 | 70%                              | 55%                              | 84%                              | 79%                              | 16                                      | 15.8                                    | 16.7                         | 16.7                         | positive            | normal                                                                            | villous blunting, intraepithelial lymphocytes, crypt hyperplasia, focal acute inflammation                                                  | 11                            |
| 755.79                                                                               | M      | Caucasian | 7                | 13                 | 70%                              | 75%                              | 30%                              | 39%                              | 17                                      | 23                                      | 1.58                         | 2.5                          | not obtained        | focal mild lamina propria acute inflammation in duodenum                          | mild villous blunting, mild focal lamina propria acute inflammation                                                                         | 42                            |
| 755.79                                                                               | M      | Caucasian | 11               | 13                 | 50%                              | 50%                              | 69%                              | 60%                              | 19                                      | 20                                      | 1.59                         | 7.4                          | positive            | mixed villous architecture                                                        | villous blunting with increased intraepithelial lymphocytes                                                                                 | 18                            |
| 876.8                                                                                | M      | Caucasian | 14               | 15                 | 25%                              | 40%                              | unknown                          | unknown                          | unknown                                 | unknown                                 | 6.2                          | 7.65                         | not obtained        | preserved villous architecture with focally increased intraepithelial lymphocytes | villous blunting in duodenum, increased intraepithelial lymphocytosis                                                                       | 19                            |
